# Supplementary material for: Hydrophobic hydration of the hydrocarbon adamantane in amorphous ice
Source: Royal Society of Chemistry journal article supplement (doi:10.1039/d3fd00102d), 2023-06-19
Supplement: d3fd00102d1.pdf [file d3fd00102d1.pdf]

**Electronic Supplementary Information (ESI)**

# Hydrophobic Hydration of the Hydrocarbon Adamantane in Amorphous Ice

*Sukhpreet K. Talewar,<sup>a</sup> Luis Carlo Pardo,<sup>b</sup> Thomas F. Headen,<sup>c</sup> Siriney O. Halukeerthi,<sup>a</sup> Bharvi Chikani,<sup>a</sup> Alexander Rosu-Finsen,<sup>a</sup> Christoph G. Salzmann<sup>\*a</sup>*

<sup>a</sup> Department of Chemistry, University College London, 20 Gordon Street, London WC1H 0AJ, United Kingdom.

<sup>b</sup> Grup de Caracterització de Materials, Departament de Física, EEBE and Barcelona Research Center in Multiscale Science and Engineering, Universitat Politècnica de Catalunya, C/Eduard Maristany 10, E-08019 Barcelona, Spain.

<sup>c</sup> ISIS Pulsed Neutron and Muon Source, STFC Rutherford Appleton Laboratory, Harwell Campus, OX11 0QX, United Kingdom.

Email: c.salzmann@ucl.ac.uk

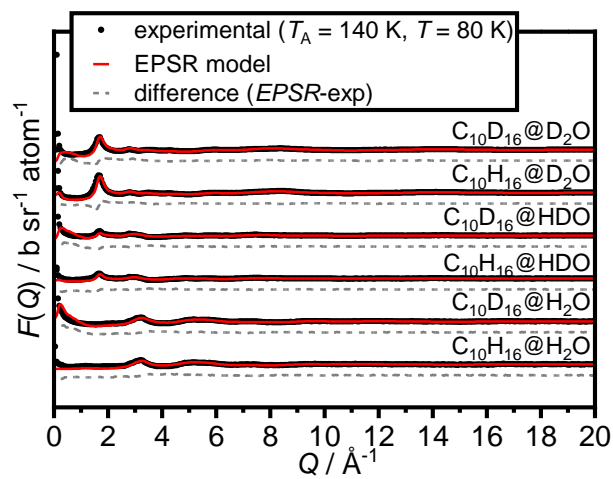

Fig. S1. Experimental neutron diffraction data and EPSR fits at 80 K after annealing at 140 K.

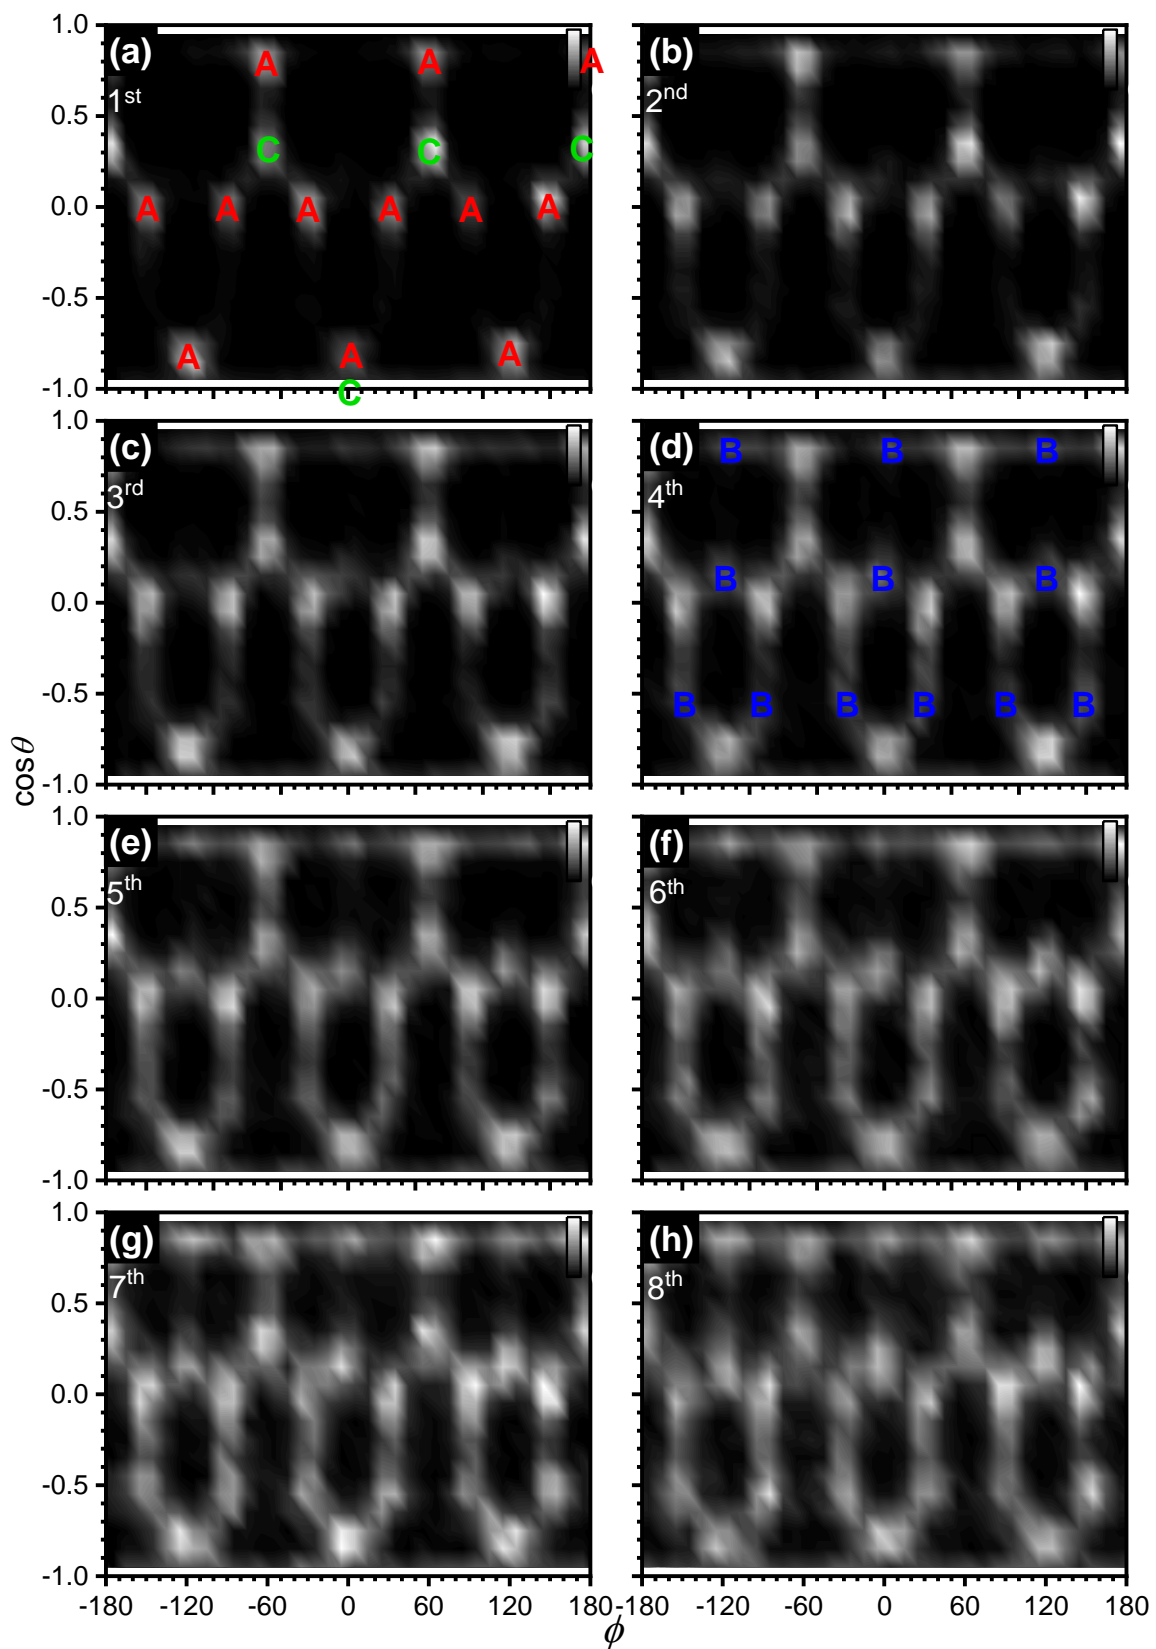

Fig. S2. Angle-dependent  $g_{\text{COM-o}}(\theta, \phi)$  pair-distribution functions with angles as defined in Fig. 3(a) for the as-made samples. The panels from (a) to (h) include increasing numbers of closest water molecules from one to eight. The symmetry distinct oxygen positions are labelled with A, B and C.

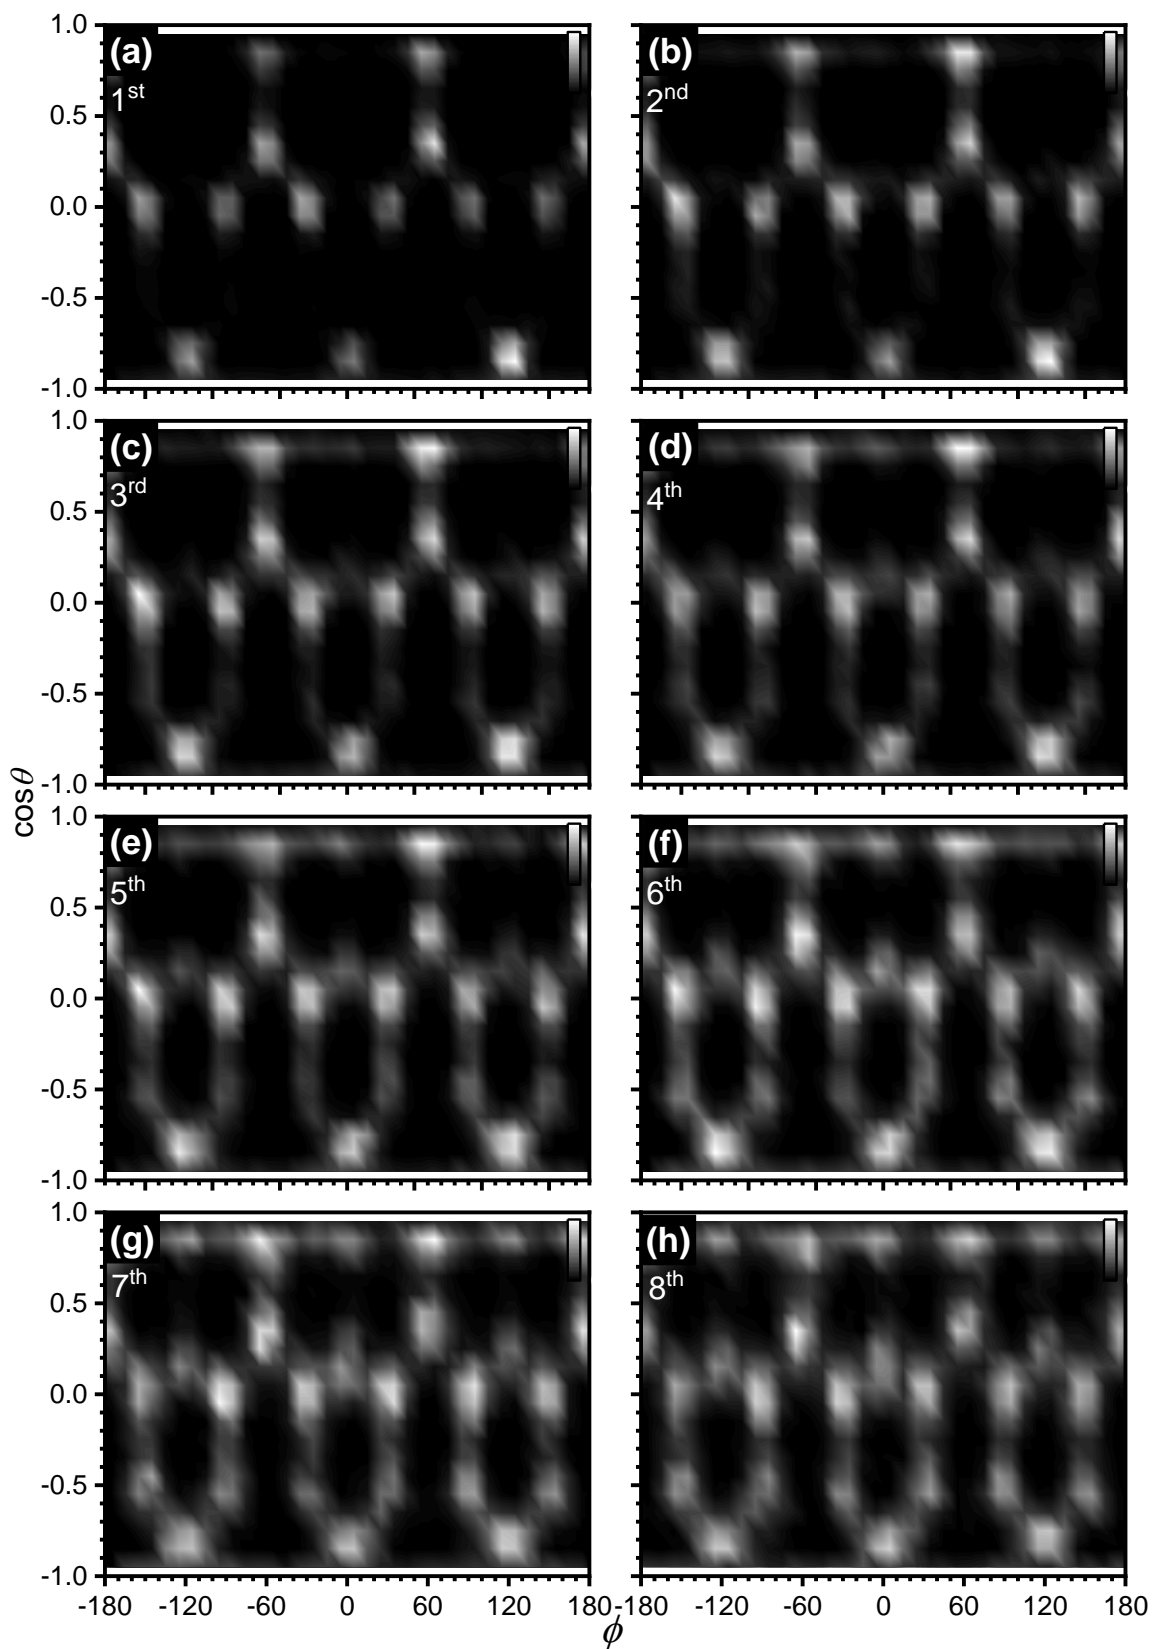

Fig. S3. Angle-dependent  $g_{\text{COM-O}}(\theta, \phi)$  pair-distribution functions with angles as defined in Fig. 3(a) for the samples at 80 K after annealing at 140 K. The panels from (a) to (h) include increasing numbers of closest water molecules from one to eight.
